# Supplementary material for: Cobalt-based current collectors for flexible electrodes and their application in lithium–sulfur batteries
Source: Royal Society of Chemistry journal article supplement (doi:10.1039/d3ta06966d), 2024-01-01
Supplement: d3ta06966d1.pdf [file d3ta06966d1.pdf]

## Supporting Information

### The cobalt-based current collectors for flexible electrodes and its application in lithium-sulfur battery

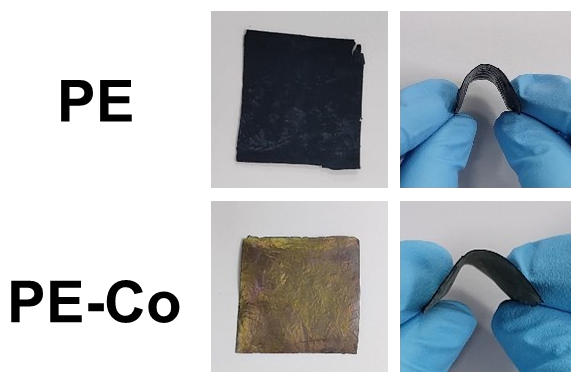

Fig. S1 Optical images of (up) PE and (bottom) PE-Co.

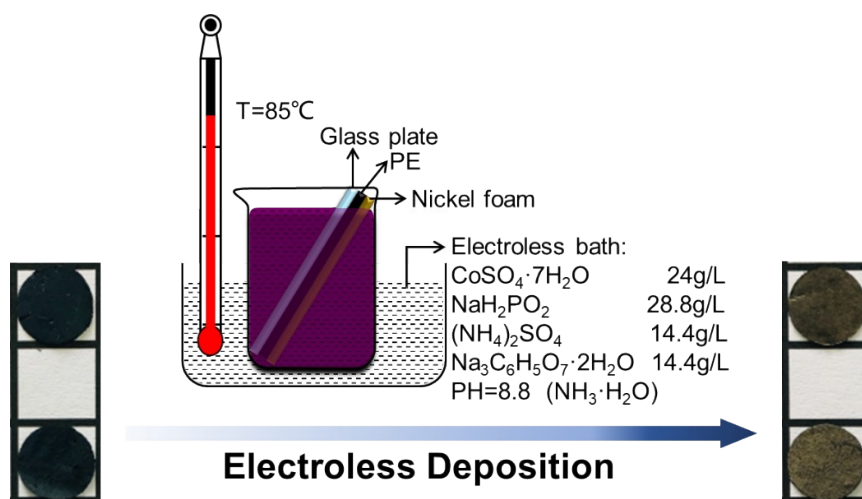

Fig. S2 The schematic diagram of electroless deposition.

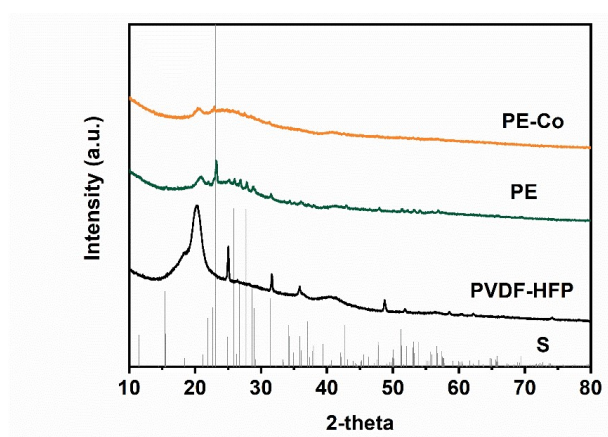

Fig. S3 The XRD spectrum of PE, PE-Co and PVDF-HFP membrane.

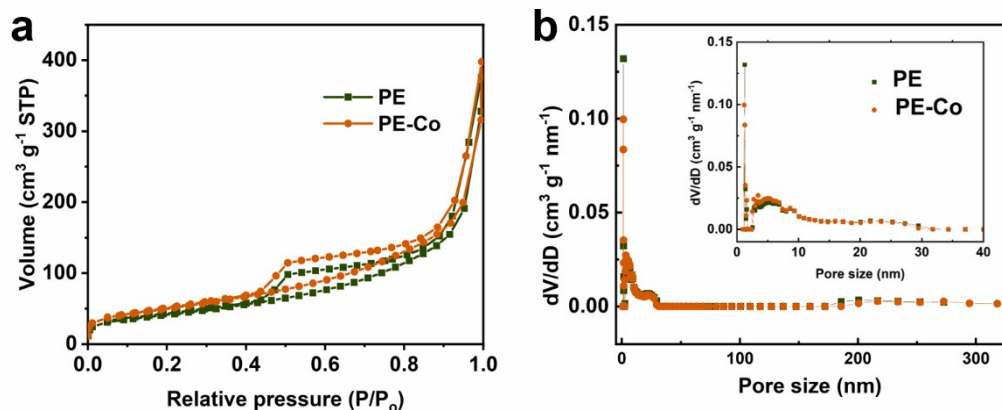

**Fig. S4** (a) Nitrogen adsorption–desorption isotherms and (b) pore size distribution curves of PE and PE-Co composites.

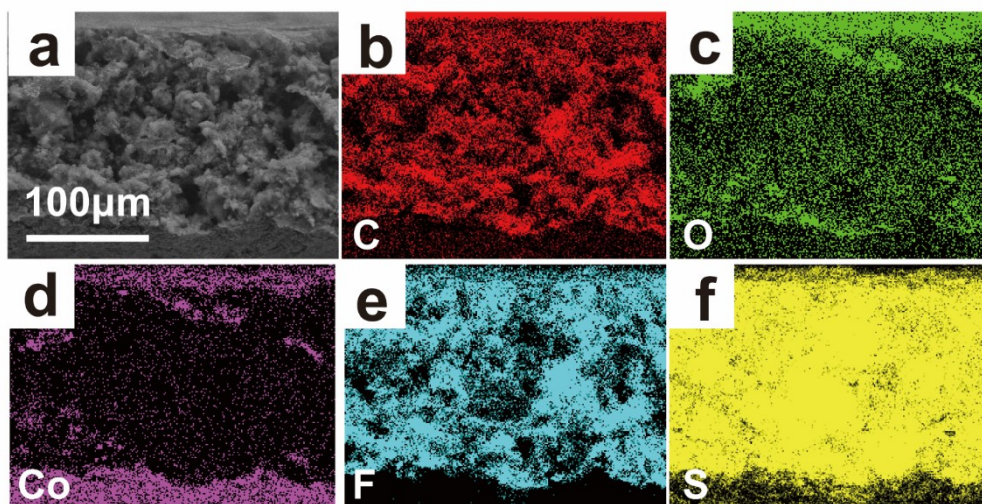

**Fig. S5** (a) Cross-section morphology of PE-Co and its elemental mapping of (b) carbon, (c) oxygen, (d) cobalt, (e) fluorine and (f) sulfur.

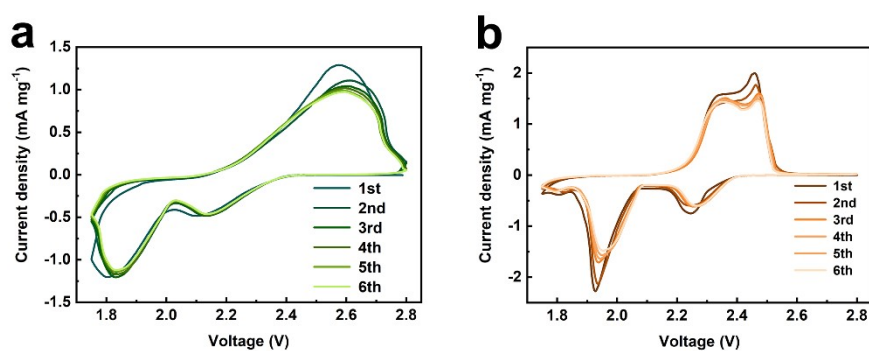

**Fig. S6** CV curves of batteries assembled with (a) PE and (b) PE-Co of 6 cycles at a scanning rate of 0.1 mV s<sup>-1</sup> in the range of 1.75-2.8 V.

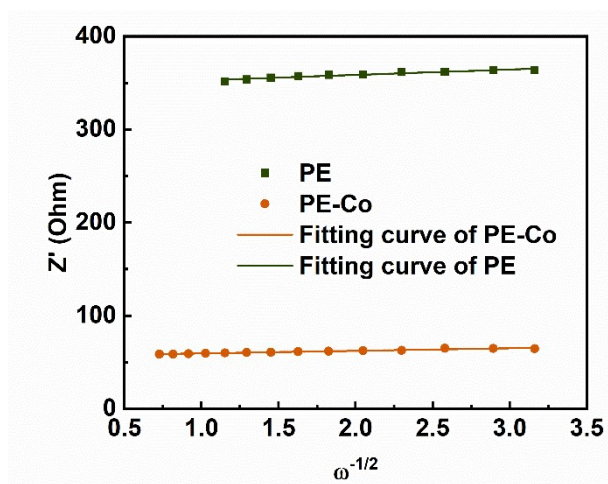

**Fig. S7** Relationship between  $Z'$  and square root of frequency ( $\omega^{-1/2}$ ) in the low-frequency region.

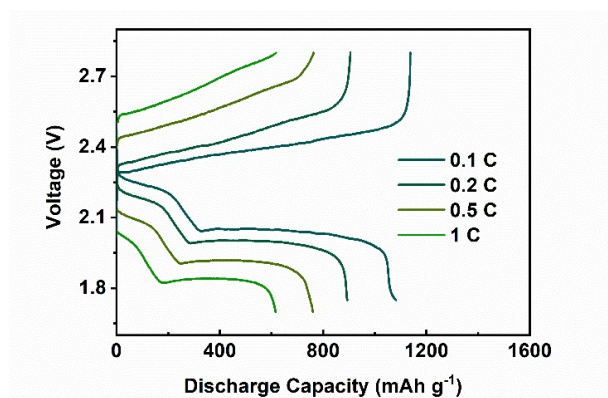

**Fig. S8** Charge/discharge curves of batteries assembled with PE at various C-rate from 0.1 to 1 C.

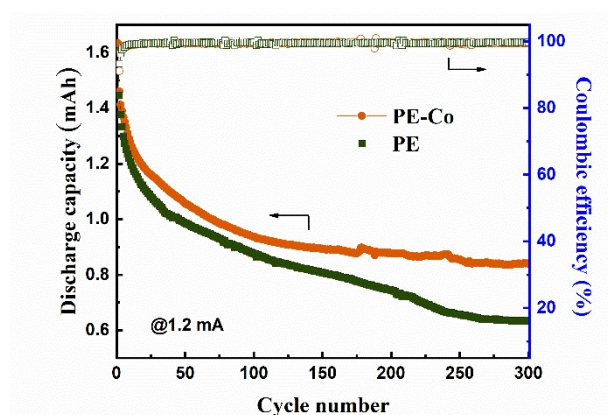

**Fig. S9** Cycling performance of batteries assembled with PE and PE-Co at 1.2 mA.

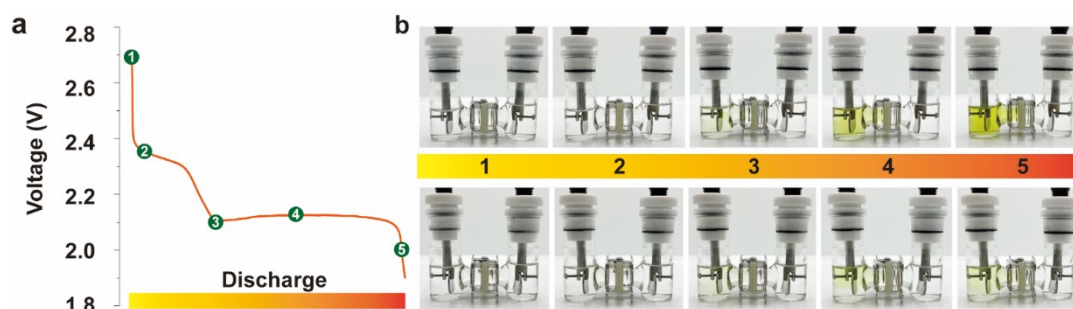

**Fig. S10** (a) Schematic of discharge curve diagram. (b) Photos of polysulfide entrapment of PE (up) and PE-Co (down) cathodes at different discharge states of 1 to 5 from (a).

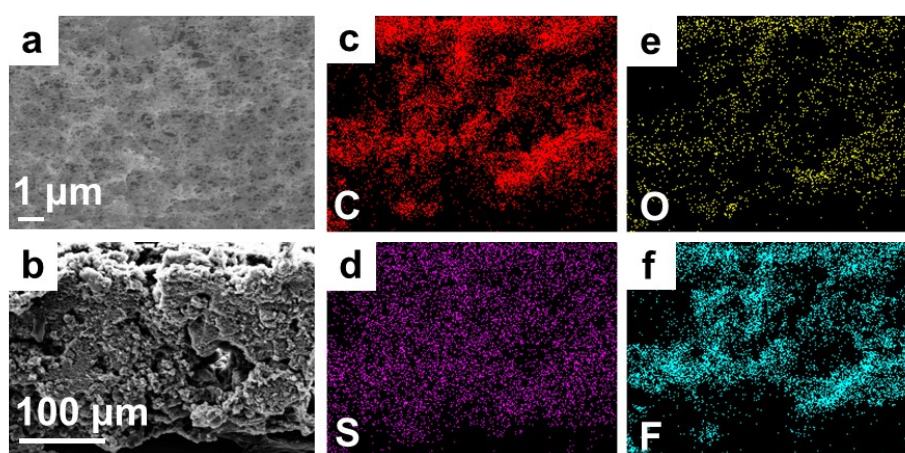

**Fig. S11** (a) Surface and (b) cross-section morphology of PE after cycling and its elemental mapping of (c) carbon, (d) sulfur, (e) oxygen, and (f) fluorine.

**Table S1** The definite quantitative porous structures of PE and PE-Co.

| sample | BET Surface Area<br>( $\text{m}^2 \text{g}^{-1}$ ) | Total Volume in Pores<br>( $\text{cm}^3 \text{g}^{-1}$ ) |
|--------|----------------------------------------------------|----------------------------------------------------------|
| PE     | 147.90                                             | 0.56                                                     |
| PE-Co  | 181.05                                             | 0.58                                                     |

**Table S2** Kinetic parameters of PE and PE-Co.

| Kinetic parameters | $R_s$<br>[ $\Omega \text{cm}^{-2}$ ] | $R_{ct}$<br>[ $\Omega \text{cm}^{-2}$ ] | $\sigma$ | $D$<br>[ $\text{cm}^2 \text{s}^{-1}$ ] |
|--------------------|--------------------------------------|-----------------------------------------|----------|----------------------------------------|
| PE                 | 2.6                                  | 421.1                                   | 5.76     | $1.09 \times 10^{-10}$                 |
| PE-Co              | 2.5                                  | 65.2                                    | 2.75     | $4.74 \times 10^{-10}$                 |

**Table S3** Statistical information of publications about flexible electrodes with high sulfur loading in Li-S battery systems.

| Sulfur hosts                              | Sulfur loading (mg cm <sup>-2</sup> ) | Capacity at last cycle (mAh g <sup>-1</sup> ) | Current density | Cycling number | Capacity retention (%) | Ref       |
|-------------------------------------------|---------------------------------------|-----------------------------------------------|-----------------|----------------|------------------------|-----------|
| PE-Co                                     | 2.5                                   | 624                                           | 0.2C            | 300            | 55.6%                  | This work |
|                                           | 8                                     | 639                                           | 0.1C            | 200            | 56.1%                  |           |
| PPy@rGO/CNTs                              | 2.8                                   | 757.9                                         | 0.2C            | 100            | 87.06                  | 1         |
|                                           | 4.5                                   | 489.5                                         | 0.2C            | 100            | 83.24                  |           |
|                                           | 5.4                                   | 390.2                                         | 0.2C            | 50             | 80                     |           |
| PEDOT: PSS                                | 6.1                                   | 559                                           | 2C              | 500            | 71.5                   | 2         |
| VIPIE(S/C+PVDF)                           | 10                                    | 917.88                                        | 0.1C            | 60             | 90.7                   | 3         |
| PES/CNT                                   | 4.8                                   | 653                                           | 0.25C           | 50             |                        | 4         |
|                                           | 5.9                                   | 539                                           |                 |                |                        |           |
|                                           | 7                                     | 507                                           |                 |                |                        |           |
| PAN/TiO <sub>2-x</sub>                    | 2.3                                   | 921.9                                         | 0.5C            | 100            |                        | 5         |
|                                           | 4.3                                   | 699.4                                         |                 |                |                        |           |
|                                           | 5.31                                  | 670                                           |                 |                |                        |           |
| Ti <sub>3</sub> C <sub>2</sub> Tx-CNT@PAN | 4.5                                   | 747.8                                         | 0.2C            | 100            | 83.68                  | 6         |
| Fe <sub>3</sub> C/C                       | 1.6                                   | 742.5                                         | 0.5C            | 100            |                        | 7         |
|                                           | 3.4                                   | 656.8                                         |                 | 100            |                        |           |
| S@Co <sub>x</sub> P/NC                    | 3.15                                  | 615.6                                         | 0.5C            | 300            |                        | 8         |
|                                           | 3.92                                  | 519.4                                         | 0.5C            | 300            |                        |           |
|                                           | 4.68                                  | 368.8                                         | 0.5C            | 300            |                        |           |
|                                           | 6.2                                   | 570                                           | 0.1C            | 100            | 59.50%                 |           |
| Fe-N-GOMC/S                               | 3                                     | 920.6                                         | 0.5C            | 500            |                        | 9         |
|                                           | 6                                     | 715                                           | 1C              | 120            |                        |           |
| MoSe <sub>2-x</sub> @GA/S                 | 4.8                                   | 503.2                                         | 1C              | 1000           | 70%                    | 10        |

## References

1. L. Bao, J. Yao, S. Zhao, Y. Lu, Y. Su, L. Chen, C. Zhao and F. Wu, *ACS Sustainable Chemistry & Engineering*, 2020, **8**, 5648-5661.
2. S. Zeng, X. Li, F. Guo, H. Zhong and Y. Mai, *Electrochimica Acta*, 2019, **320**, 134571.
3. Y. Yu, H. Zhang, X. Yang, Y. Chen, Z. Jia, J. Yan, H. Zhang and X. Li, *Journal of Materials Chemistry A*, 2018, **6**, 24066.
4. W. Wahyudi, Z. Cao, P. Kumar, M. Li, Y. Wu, M. N. Hedhili, T. D. Anthopoulos, L. Cavallo, L.-J. Li and J. Ming, *Advanced Functional Materials*, 2018, 1802244.
5. S.-Y. Qiu, C. Wang, L.-L. Gu, K.-X. Wang, X.-T. Gao, J. Gao, Z. Jiang, J. Gu and X.-D. Zhu, *Dalton Transactions*, 2022, **51**, 2855-2862.
6. S. Gu, H. Jiang, X. Li, Y. Dai, W. Zheng, X. Jiang and G. He, *Energy Storage Materials*,

- 2022, **53**, 32-41.
7. W. Kou, G. Chen, Y. Liu, W. Guan, X. Li, N. Zhang and G. He, *Journal of Materials Chemistry A*, 2019, **7**, 20614-20623.
  8. J. Luo, Y. Wang, Y. Mao, Y. Zhang, Y. Su, B. Zou, S. Chen, Q. Deng, Z. Zeng, J. Wang and S. Deng, *Chemical Engineering Journal*, 2022, **433**, 133549.
  9. H. Li, D. Liu, X. Zhu, D. Qu, Z. Xie, J. Li, H. Tang, D. Zheng and D. Qu, *Nano Energy*, 2020, **73**, 104763.
  10. S. Zhai, Z. Ye, R. Liu, H. Xu, C. Li, W. Liu, X. Wang and T. Mei, *Advanced Functional Materials*, 2023, 2314379.
